# Supplementary material for: Biostimulation of Plectranthus amboinicus (Lour.) Spreng. with Different Yeast Strains: Morphological Performance, Productivity, Phenotypic Plasticity, and Antioxidant Activity
Source: MDPI journal article supplement (doi:10.3390/horticulturae8100887), 2022-09-28
Supplement: s1 [file s1]

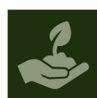

# Biostimulation of *Plectranthus amboinicus* (Lour.) Spreng. with Different Yeast Strains: Morphological Performance, Productivity, Phenotypic Plasticity, and Antioxidant Activity

Khalid S. Alshallash <sup>1\*</sup>, Mohamed F. Mohamed <sup>2</sup>, Abeer A. Dahab <sup>2</sup>, Hemat S. Abd El-Salam <sup>2</sup>, and Rasha S. El-Serafi <sup>3\*</sup>

<sup>1</sup> College of Science and Humanities—Huraymila, Imam Mohammed Bin Saud Islamic University (IMSIU), Riyadh 11432, Saudi Arabia

<sup>2</sup> Medicinal and Aromatic Plants Research Department, Horticulture Research Institute, Agricultural Research Center, Giza 12619, Egypt

<sup>3</sup> Horticulture Department, Faculty of Agriculture, Tanta University, Tanta 31527, Egypt

\* Correspondence: ksalshallash@imamu.edu.sa (K.S.A.); rasha.elsefafi@agr.tanta.edu.eg (R.S.E.-S.)

**Table S1.** Effects of yeast strains of *Rhodotorula muciligenese*, *Candida sake*, *Candida apicola*, and *Candida kunwiensis* yeast strains at 0,  $1 \times 10^4$ ,  $1 \times 10^7$ , and  $1 \times 10^9$  concentrations on plant height (cm), branches number, and leaves number of *Plectranthus amboinicus* (Lour.) Spreng. in 2019 and 2020 growing seasons.

| Treatments                                 | Plant height |               | Number of branches |               | Number of leaves |               |
|--------------------------------------------|--------------|---------------|--------------------|---------------|------------------|---------------|
|                                            | First season | Second season | First Season       | Second season | First season     | Second season |
| Yeast strain (Y)                           |              |               |                    |               |                  |               |
| <i>Rhodotorula muciligenese</i> (Y1)       | 76.2±1.9d    | 72.1±1.8c     | 5.2±0.5c           | 5.6±0.5b      | 91.8±2.1b        | 90.0±2.7bc    |
| <i>Candida sake</i> (Y2)                   | 84.3±3.2c    | 87.2±4.3b     | 6.0±0.7b           | 5.9±0.6b      | 92.8±2.2b        | 92.1±2.6b     |
| <i>Candida apicola</i> (Y3)                | 91.4±4.5a    | 94.9±5.6a     | 7.5±0.9a           | 8.8±0.9a      | 97.8±3.0a        | 99.0±3.7a     |
| <i>Candida kunwiensis</i> (Y4)             | 88.7±4.0b    | 87.7±4.4b     | 4.3±0.3d           | 5.3±0.3b      | 83.2±0.7c        | 87.0±1.7c     |
| P value                                    | 0.00**       | 0.00**        | 0.00**             | 0.00**        | 0.00**           | 0.00**        |
| Concentrations (CFU mL <sup>-1</sup> ) (C) |              |               |                    |               |                  |               |
| 0 (C1)                                     | 66.0±0.6c    | 62.7±0.2c     | 2.7±0.1c           | 3.7±0.1c      | 81.3±0.5c        | 78.0±0.5c     |
| $1 \times 10^4$ (C2)                       | 90.8±2.3ab   | 92.3±3.3b     | 6.0±0.6b           | 6.4±0.7b      | 93.9±2.2b        | 96.5±1.8ab    |
| $1 \times 10^7$ (C3)                       | 93.4±2.4a    | 94.9±3.4a     | 7.6±0.5a           | 8.3±0.6a      | 97.3±2.3a        | 99.2±1.9a     |
| $1 \times 10^9$ (C4)                       | 90.4±2.6b    | 92.0±3.5b     | 6.7±0.5b           | 7.3±0.6b      | 92.9±2.2b        | 94.4±2.4b     |
| P value                                    | 0.00**       | 0.00**        | 0.00**             | 0.00**        | 0.00**           | 0.00**        |

\* and \*\* indicate, respectively, differences at  $p \leq 0.05$  and 0.01 probability level. Means followed by the same letter in each column are not significantly different according to Tukey's test ( $p \leq 0.05$ ).

**Table S2.** Effects of yeast strains of *Rhodotorula muciligenese*, *Candida sake*, *Candida apicola*, and *Candida kunwiensis* yeast strains at 0,  $1 \times 10^4$ ,  $1 \times 10^7$ , and  $1 \times 10^9$  concentrations on root length (cm), root weight (g), and root:shoot length ratio of *Plectranthus amboinicus* (Lour.) Spreng. in 2019 and 2020 growing seasons.

| Treatments                                 | Root length  |               | Root weight  |               | Root:shoot length ratio |               |
|--------------------------------------------|--------------|---------------|--------------|---------------|-------------------------|---------------|
|                                            | First season | Second season | First season | Second season | First season            | Second season |
| Yeast strain (Y)                           |              |               |              |               |                         |               |
| <i>Rhodotorula muciligenese</i> (Y1)       | 11.5±0.3d    | 12.2±0.3d     | 6.4±0.4d     | 7.2±0.5d      | 0.151±0.003d            | 0.169±0.003c  |
| <i>Candida sake</i> (Y2)                   | 15.7±0.9b    | 17.8±1.2b     | 9.8±1.0b     | 10.6±1.1b     | 0.184±0.005b            | 0.202±0.006a  |
| <i>Candida apicola</i> (Y3)                | 18.9±1.5a    | 20.4±1.6a     | 11.7±1.3a    | 12.0±1.3a     | 0.203±0.008a            | 0.211±0.007a  |
| <i>Candida kunwiensis</i> (Y4)             | 14.8±0.8c    | 16.0±0.9c     | 8.6±0.7c     | 9.1±0.8c      | 0.166±0.002c            | 0.182±0.002b  |
| <i>P</i> value                             | 0.00**       | 0.00**        | 0.00**       | 0.00**        | 0.00**                  | 0.00**        |
| Concentrations (CFU mL <sup>-1</sup> ) (C) |              |               |              |               |                         |               |
| 0 (C1)                                     | 10.5±0.1c    | 11.1±0.1c     | 4.6±0.1c     | 4.8±0.2c      | 0.159±0.001c            | 0.178±0.003c  |
| $1 \times 10^4$ (C2)                       | 16.5±1.2b    | 18.3±1.2b     | 10.2±0.9b    | 10.9±0.8b     | 0.179±0.009b            | 0.195±0.007ab |
| $1 \times 10^7$ (C3)                       | 17.7±1.1a    | 19.4±1.3a     | 11.4±0.8a    | 12.2±0.7a     | 0.188±0.008a            | 0.202±0.007a  |
| $1 \times 10^9$ (C4)                       | 16.2±1.0b    | 17.6±1.2b     | 10.4±0.7b    | 11.0±0.7b     | 0.178±0.007b            | 0.189±0.007bc |
| <i>P</i> value                             | 0.00**       | 0.00**        | 0.00**       | 0.00**        | 0.00**                  | 0.00**        |

\* and \*\* indicate, respectively, differences at  $p \leq 0.05$  and 0.01 probability level. Means followed by the same letter in each column are not significantly different according to Tukey's test ( $p \leq 0.05$ ).

**Table S3.** Effects of yeast strains of *Rhodotorula muciligenese*, *Candida sake*, *Candida apicola*, and *Candida kunwiensis* yeast strains at  $0$ ,  $1 \times 10^4$ ,  $1 \times 10^7$ , and  $1 \times 10^9$  concentrations on fresh weight (g), essential oil (%), and essential oil yield (mL) of *Plectranthus amboinicus* (Lour.) Spreng. in 2019 and 2020 growing seasons.

| Treatments                                 | Fresh weight |               | Essential oil |               | Essential oil yield |               |
|--------------------------------------------|--------------|---------------|---------------|---------------|---------------------|---------------|
|                                            | First season | Second season | First Season  | Second season | First season        | Second season |
| Yeast strain (Y)                           |              |               |               |               |                     |               |
| <i>Rhodotorula muciligenese</i> (Y1)       | 217.7±11.3d  | 230.2±12.7d   | 0.190±0.003c  | 0.196±0.004c  | 0.418±0.027d        | 0.455±0.030d  |
| <i>Candida sake</i> (Y2)                   | 329.0±30.7b  | 321.6±28.6b   | 0.205±0.006b  | 0.213±0.006b  | 0.693±0.075b        | 0.702±0.073b  |
| <i>Candida apicola</i> (Y3)                | 349.0±34.0a  | 337.3±31.1a   | 0.212±0.007a  | 0.220±0.007a  | 0.764±0.087a        | 0.765±0.084a  |
| <i>Candida kunwiensis</i> (Y4)             | 263.3±19.0c  | 250.5±16.0c   | 0.193±0.004c  | 0.199±0.004c  | 0.516±0.043c        | 0.506±0.039c  |
| P value                                    | 0.00**       | 0.00**        | 0.00**        | 0.00**        | 0.00**              | 0.00**        |
| Concentrations (CFU mL <sup>-1</sup> ) (C) |              |               |               |               |                     |               |
| 0 (C1)                                     | 154.2±1.4d   | 159.1±1.6d    | 0.174±0.001c  | 0.179±0.002c  | 0.268±0.001c        | 0.284±0.001c  |
| $1 \times 10^4$ (C2)                       | 336.3±20.9b  | 328.3±18.3b   | 0.205±0.004b  | 0.212±0.004b  | 0.697±0.054b        | 0.702±0.051b  |
| $1 \times 10^7$ (C3)                       | 343.0±21.5a  | 334.8±18.7a   | 0.212±0.004a  | 0.219±0.004a  | 0.736±0.057a        | 0.742±0.054a  |
| $1 \times 10^9$ (C4)                       | 325.6±21.0c  | 317.6±18.2c   | 0.210±0.004a  | 0.218±0.004a  | 0.691±0.056b        | 0.699±0.052b  |
| P value                                    | 0.00**       | 0.00**        | 0.00**        | 0.00**        | 0.00**              | 0.00**        |

\* and \*\* indicate, respectively, differences at  $p \leq 0.05$  and  $0.01$  probability level. Means followed by the same letter in each column are not significantly different according to Tukey's test ( $p \leq 0.05$ ).

**Table S4.** Effects of yeast strains of *Rhodotorula muciligenese*, *Candida sake*, *Candida apicola*, and *Candida kunwiensis* yeast strains at 0,  $1 \times 10^4$ ,  $1 \times 10^7$ , and  $1 \times 10^9$  concentrations on total carbohydrate (%), total ash (%), and protein (%) of *Plectranthus amboinicus* (Lour.) Spreng. in 2019 and 2020 growing seasons.

| Treatments                                 | Total carbohydrate |               | Total ash    |               | Protein      |               |
|--------------------------------------------|--------------------|---------------|--------------|---------------|--------------|---------------|
|                                            | First season       | Second season | First Season | Second season | First season | Second season |
| Yeast strain (Y)                           |                    |               |              |               |              |               |
| <i>Rhodotorula muciligenese</i> (Y1)       | 27.5±0.6c          | 28.9±0.8b     | 7.6±0.2b     | 7.6±0.2c      | 7.1±0.2c     | 7.7±0.2c      |
| <i>Candida sake</i> (Y2)                   | 28.8±0.8b          | 31.1±1.1a     | 8.1±0.3a     | 8.2±0.3b      | 7.5±0.3b     | 8.2±0.3b      |
| <i>Candida apicola</i> (Y3)                | 30.2±1.1a          | 31.5±1.2a     | 8.2±0.3a     | 8.3±0.3a      | 7.8±0.3a     | 8.6±0.4a      |
| <i>Candida kunwiensis</i> (Y4)             | 26.5±0.5c          | 28.9±0.7b     | 7.1±0.1c     | 7.1±0.1d      | 6.7±0.2d     | 7.3±0.2d      |
| P value                                    | 0.00**             | 0.00**        | 0.00**       | 0.00**        | 0.00**       | 0.00**        |
| Concentrations (CFU mL <sup>-1</sup> ) (C) |                    |               |              |               |              |               |
| 0 (C1)                                     | 24.5±0.3c          | 25.1±0.2c     | 6.5±0.0d     | 6.6±0.0d      | 6.1±0.1c     | 6.6±0.1c      |
| $1 \times 10^4$ (C2)                       | 28.5±0.5b          | 30.4±0.6b     | 7.8±0.2c     | 7.8±0.2c      | 7.3±0.2b     | 8.1±0.2b      |
| $1 \times 10^7$ (C3)                       | 30.5±0.7a          | 33.3±0.6a     | 8.7±0.2a     | 8.6±0.2a      | 8.2±0.2a     | 8.9±0.2a      |
| $1 \times 10^9$ (C4)                       | 29.4±0.6ab         | 31.6±0.5b     | 7.9±0.2b     | 8.1±0.2b      | 7.6±0.2b     | 8.2±0.2b      |
| P value                                    | 0.00**             | 0.00**        | 0.00**       | 0.00**        | 0.00**       | 0.00**        |

\* and \*\* indicate, respectively, differences at  $p \leq 0.05$  and 0.01 probability level. Means followed by the same letter in each column are not significantly different according to Tukey's test ( $p \leq 0.05$ ).

**Table S5.** Effects of yeast strains of *Rhodotorula muciligenese*, *Candida sake*, *Candida apicola*, and *Candida kunwiensis* yeast strains at 0,  $1 \times 10^4$ ,  $1 \times 10^7$ , and  $1 \times 10^9$  concentrations on antioxidant DPPH, and antioxidant FRAP of *Plectranthus amboinicus* (Lour.) Spreng. in 2019 and 2020 growing seasons.

| Treatments                                 | Antioxidant DPPH |               | Antioxidant FRAP |               |
|--------------------------------------------|------------------|---------------|------------------|---------------|
|                                            | First season     | Second season | First season     | Second season |
| Yeast strain (Y)                           |                  |               |                  |               |
| <i>Rhodotorula muciligenese</i> (Y1)       | 193.5±1.8c       | 203.2±1.8c    | 111.1±3.0b       | 120.0±3.9c    |
| <i>Candida sake</i> (Y2)                   | 206.6±3.8b       | 216.8±3.9b    | 118.0±4.2a       | 128.2±5.4b    |
| <i>Candida apicola</i> (Y3)                | 213.2±4.9a       | 223.8±5.2a    | 122.6±4.9a       | 132.7±6.2a    |
| <i>Candida kunwiensis</i> (Y4)             | 192.8±1.6c       | 203.9±1.8c    | 108.5±2.4b       | 116.5±3.2c    |
| P value                                    | 0.00**           | 0.00**        | 0.00**           | 0.00**        |
| Concentrations (CFU mL <sup>-1</sup> ) (C) |                  |               |                  |               |
| 0 (C1)                                     | 186.0±0.8c       | 195.5±0.9c    | 96.0±1.4c        | 98.6±0.8c     |
| $1 \times 10^4$ (C2)                       | 202.6±3.4b       | 213.5±3.3b    | 117.9±2.2b       | 129.4±2.4b    |
| $1 \times 10^7$ (C3)                       | 209.8±3.6a       | 220.4±3.7a    | 126.7±3.1a       | 138.6±3.5a    |
| $1 \times 10^9$ (C4)                       | 207.6±3.8a       | 218.3±3.9a    | 119.5±2.1b       | 130.7±2.3b    |
| P value                                    | 0.00**           | 0.00**        | 0.00**           | 0.00**        |

\* and \*\* indicate, respectively, differences at  $p \leq 0.05$  and 0.01 probability level. Means followed by the same letter in each column are not significantly different according to Tukey's test ( $p \leq 0.05$ ).

**Table S6.** Effects of yeast strains of *Rhodotorula muciligenese*, *Candida sake*, *Candida apicola*, and *Candida kunwiensis* yeast strains at 0,  $1 \times 10^4$ ,  $1 \times 10^7$ , and  $1 \times 10^9$  concentrations N (%), P (mg 100 mL<sup>-1</sup>), and K (mg 100 mL<sup>-1</sup>) of *Plectranthus amboinicus* (Lour.) Spreng. in 2019 and 2020 growing seasons.

| Treatments                                 | N            |               | P            |               | K            |               |
|--------------------------------------------|--------------|---------------|--------------|---------------|--------------|---------------|
|                                            | First season | Second season | First season | Second season | First season | Second season |
| Yeast strain (Y)                           |              |               |              |               |              |               |
| <i>Rhodotorula muciligenese</i> (Y1)       | 1.14±0.04c   | 1.23±0.03c    | 84.24±2.22b  | 86.93±2.30b   | 154.64±3.93c | 159.93±4.06c  |
| <i>Candida sake</i> (Y2)                   | 1.20±0.04b   | 1.32±0.05b    | 90.09±3.31a  | 93.07±3.41a   | 165.62±6.02b | 167.79±5.23b  |
| <i>Candida apicola</i> (Y3)                | 1.25±0.05a   | 1.37±0.06a    | 92.94±3.78a  | 94.18±3.64a   | 169.68±6.70a | 172.33±6.27a  |
| <i>Candida kunwiensis</i> (Y4)             | 1.07±0.03d   | 1.16±0.03d    | 78.91±1.88c  | 83.27±1.87c   | 146.06±3.05d | 151.64±3.15d  |
| P value                                    | 0.00**       | 0.00**        | 0.00**       | 0.00**        | 0.00**       | 0.00**        |
| Concentrations (CFU mL <sup>-1</sup> ) (C) |              |               |              |               |              |               |
| 0 (C1)                                     | 0.97±0.01c   | 1.06±0.01c    | 72.77±0.74c  | 75.26±0.86c   | 133.66±0.56c | 138.24±0.50d  |
| $1 \times 10^4$ (C2)                       | 1.17±0.03b   | 1.29±0.03b    | 87.19±2.24b  | 90.26±1.81b   | 161.50±3.60b | 165.69±3.27c  |
| $1 \times 10^7$ (C3)                       | 1.31±0.03a   | 1.42±0.04a    | 96.98±2.34a  | 99.90±2.17a   | 177.94±4.09a | 178.87±3.05a  |
| $1 \times 10^9$ (C4)                       | 1.21±0.03b   | 1.31±0.03b    | 89.24±2.34b  | 92.05±1.81b   | 162.90±3.78b | 168.88±3.61b  |
| P value                                    | 0.00**       | 0.00**        | 0.00**       | 0.00**        | 0.00**       | 0.00**        |

\* and \*\* indicate, respectively, differences at  $p \leq 0.05$  and 0.01 probability level. Means followed by the same letter in each column are not significantly different according to Tukey's test ( $p \leq 0.05$ ).
